# Supplementary material for: Solution structure of Domains IVa and V of the τ subunit of Escherichia coli DNA polymerase III and interaction with the α subunit
Source: PubMed Central journal article supplement — Nucleic Acids Res. 2007 Apr 22;35(9):2825–32. doi: 10.1093/nar/gkm080 (PMC1888800; doi:10.1093/nar/gkm080), 2007-04-22
Supplement: nar_gkm080_1.pdf [file nar_gkm080_1.pdf]

Supplementary data

Solution structure of Domains IVa and V of the  $\tau$  subunit of *Escherichia coli* DNA  
polymerase III and interaction with the  $\alpha$  subunit

Xun-Cheng Su, Slobodan Jergic, Max A. Keniry, Nicholas E. Dixon and Gottfried Otting

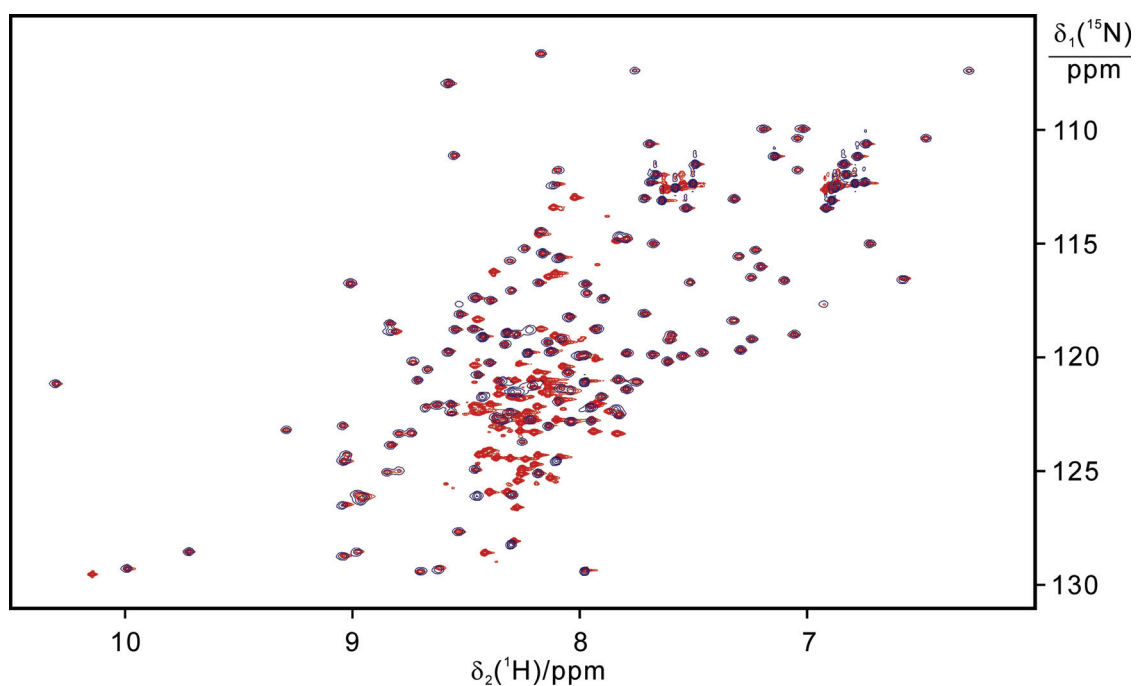

Figure S1. Superposition of  $^{15}\text{N}$ -HSQC spectra of  $^{15}\text{N}$ -labeled  $\tau_{\text{C}22}$  (red) and  $\tau_{\text{C}14}$  (blue). The spectra were recorded in 10 mM sodium phosphate (pH 6.8) containing 100 mM NaCl, 1 mM dithiothreitol, 0.1 mM  $\text{NaN}_3$  and 90%  $\text{H}_2\text{O}/10\%$   $\text{D}_2\text{O}$  on a Bruker Avance 800 NMR spectrometer. The sample concentrations were 0.4 mM for  $\tau_{\text{C}22}$  and 0.2 mM for  $\tau_{\text{C}14}$ . The additional cross-peaks observed for  $\tau_{\text{C}22}$  display a narrow  $^1\text{H}$  chemical shift dispersion around about 8.2 ppm which is characteristic of random coil chemical shifts. The cross-peaks of  $\tau_{\text{C}14}$  superimpose closely with corresponding cross-peaks of  $\tau_{\text{C}22}$ , indicating that the globular structure of  $\tau_{\text{C}14}$  is unperturbed by the additional residues present in  $\tau_{\text{C}22}$ .

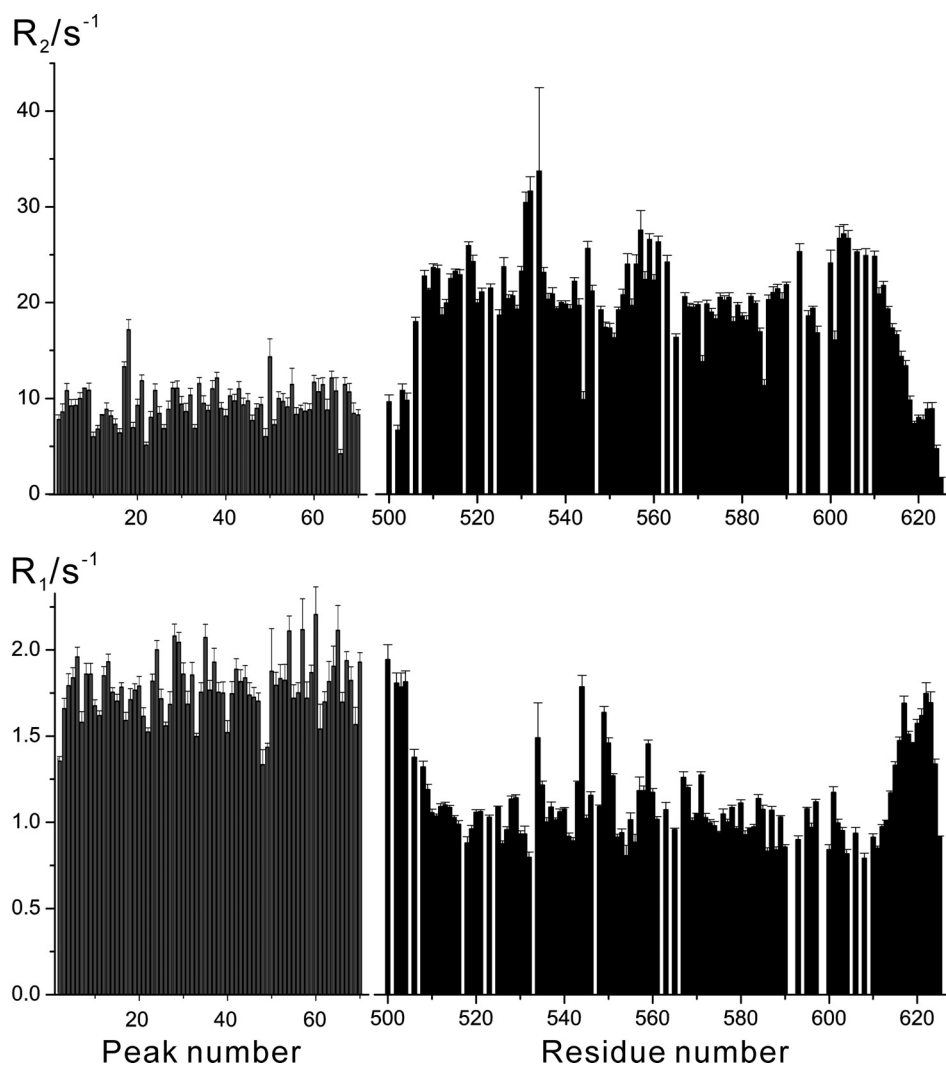

Figure S2.  $^{15}\text{N}$ -relaxation rates of  $\tau_{\text{C}22}$  recorded under the conditions of Figure S1. Sequence specific resonance assignments were obtained only for Domain V and the additional cross-peaks present in the  $^{15}\text{N}$ -HSQC spectrum of  $\tau_{\text{C}22}$  were arbitrarily numbered from 1 to 69. Their relaxation data are shown on the left. The  $R_1$  relaxation rates (lower panel) were derived from nine spectra recorded with relaxation delays of 3, 30, 100, 200, 350, 600, 900, and 1300 ms. The  $R_2$  relaxation rates (upper panel) were derived from eight spectra recorded with relaxation delays of 9, 17, 26, 43, 60, 78, 95, and 112 ms. The uniformly large  $R_1$  and small  $R_2$  values of the additional 69 residues present in  $\tau_{\text{C}22}$  are characteristic of highly mobile random coil conformation.
